# Supplementary material
Source: publisher figshare collection journal article supplement (https://acs.figshare.com/ndownloader/files/4583965)
Supplement: Supplementary file 1 [file 4583965]

# Supporting Information

## **Periodic Graphene Nanobuds**

Xiaojun Wu and Xiao Cheng Zeng<sup>\*</sup>

*Department of Chemistry and Nebraska Center for Materials and Nanoscience, University of  
Nebraska-Lincoln, Lincoln, Nebraska 68588*

\*xczeng@phase2.unl.edu

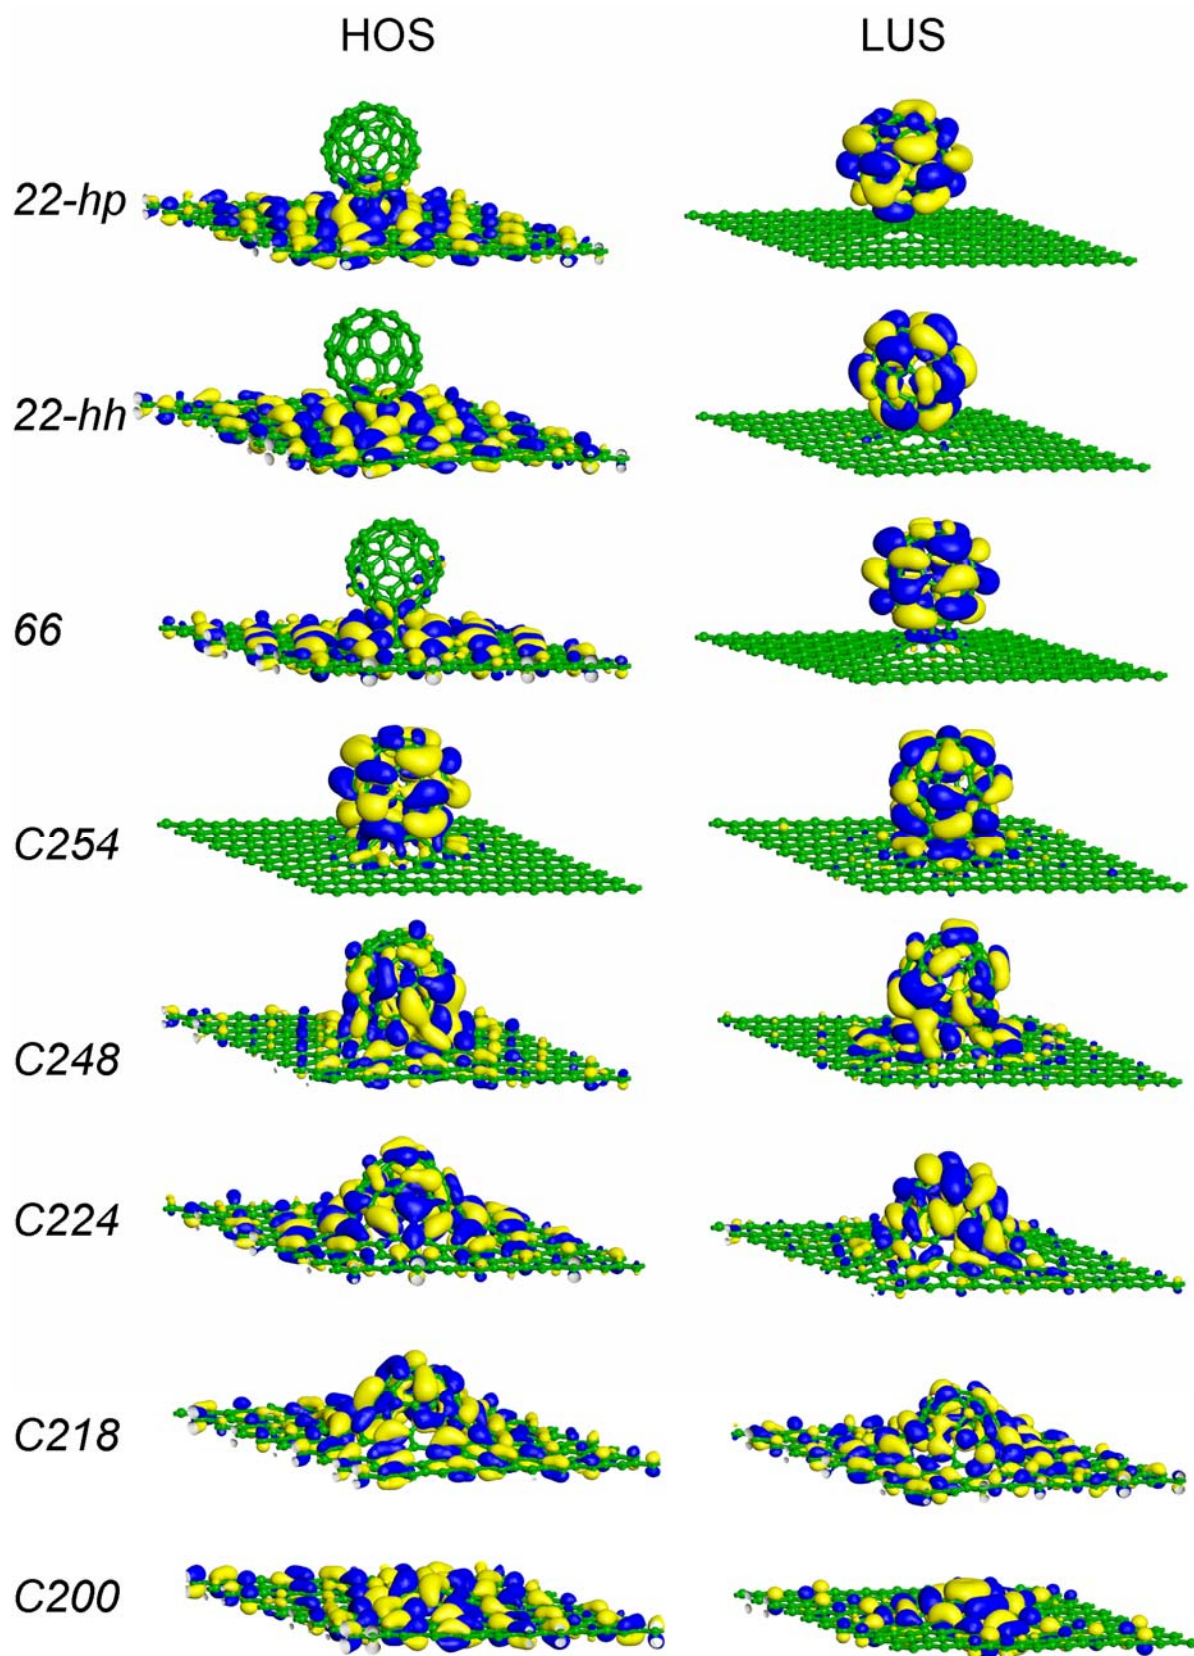

**Figure S1.** Profiles of electronic HOS, and LUS for various model systems of periodic graphene nanobud. The iso-surface value is  $\pm 0.01$  (distinguished with blue/yellow color) in atomic unit (a.u./Bohr<sup>3</sup>).
